# Supplementary material for: Developing a new sustainable eco-adsorbent film from flexographic printing plate waste to remove cationic organic and inorganic pollutants
Source: Royal Society of Chemistry journal article supplement (doi:10.1039/d4ra02111h), 2024-01-01
Supplement: d4ra02111h1.pdf [file d4ra02111h1.pdf]

*Supplementary Material*

## **Developing new sustainable eco-adsorbent film from Flexographic printing plates waste to remove cationic organic and inorganic pollutants**

Noha A. Elessawy <sup>1\*</sup>, Abdulrahman G. Alhamzani<sup>2</sup>, Mortaga M. Abou-Krishna<sup>2</sup>, Saad Aljlil<sup>3</sup>

<sup>1</sup> Computer Based Engineering Applications Department, Informatics Research Institute IRI, Alexandria 21934, Egypt.

<sup>2</sup> Chemistry Department, College of Science, Imam Mohammad Ibn Saud Islamic University (IMSIU), Riyadh 11623, Saudi Arabia.

<sup>3</sup> Institute of Water Management & Treatment Technologies, King Abdulaziz City for Science and Technology (KACST), Riyadh 11442, Saudi Arabia

\*Corresponding authors: (N. A. Elessawy) nony\_essawy@yahoo.com

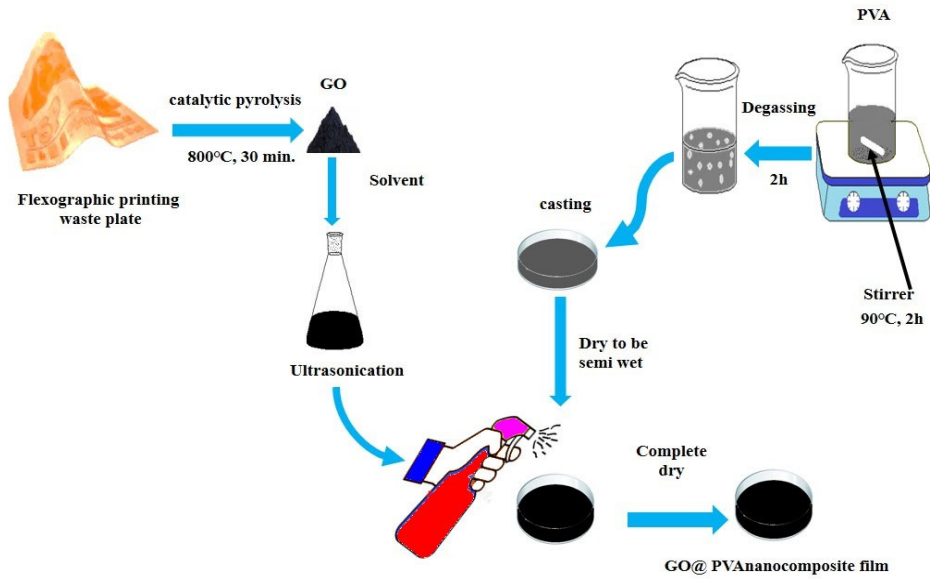

**Figure S1:** A schematic illustration of the steps taken in producing GO@PVA coated film.

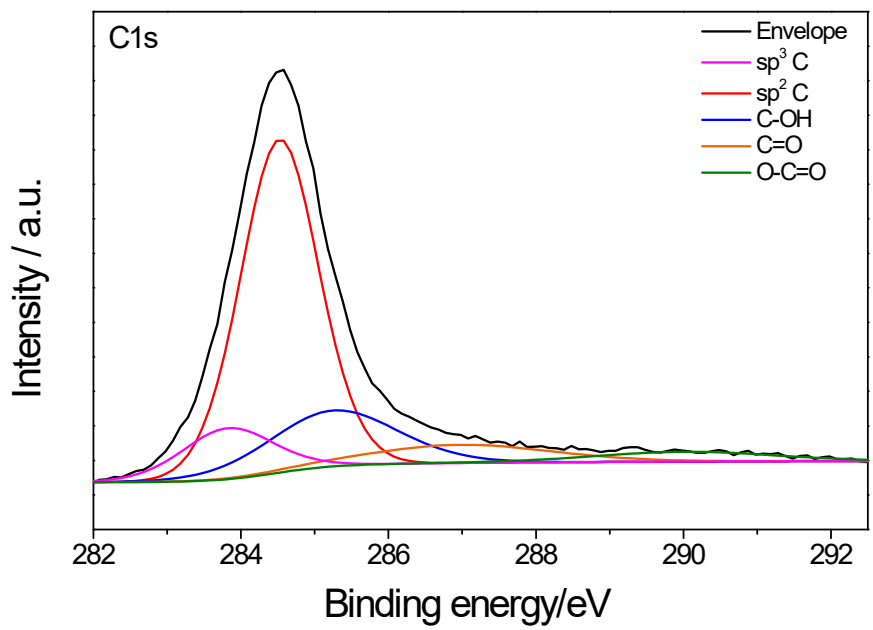

(a)

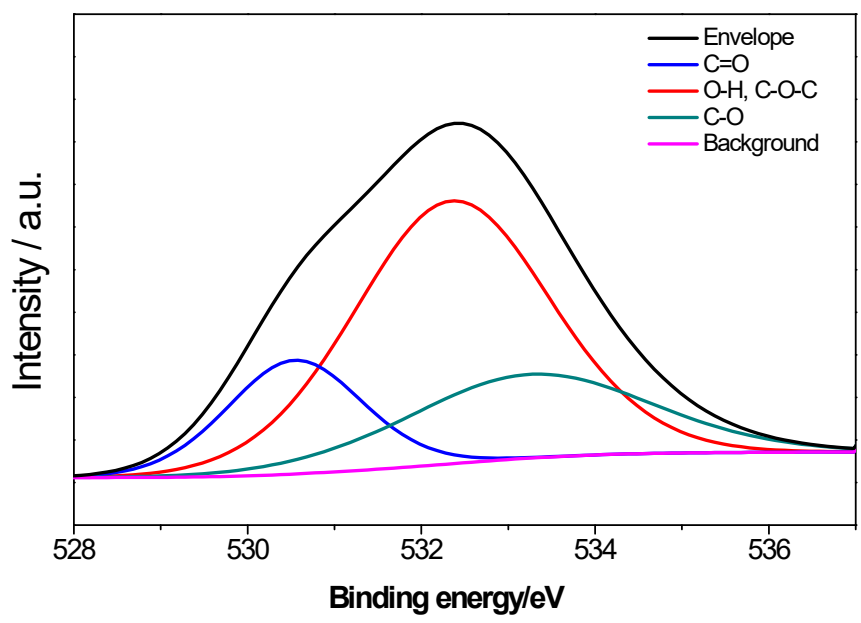

(b)

**Figure S2:** (a) C1s, (b) O1s high-resolution XPS spectrum for prepared GO nanoparticles.

Supplementary Material

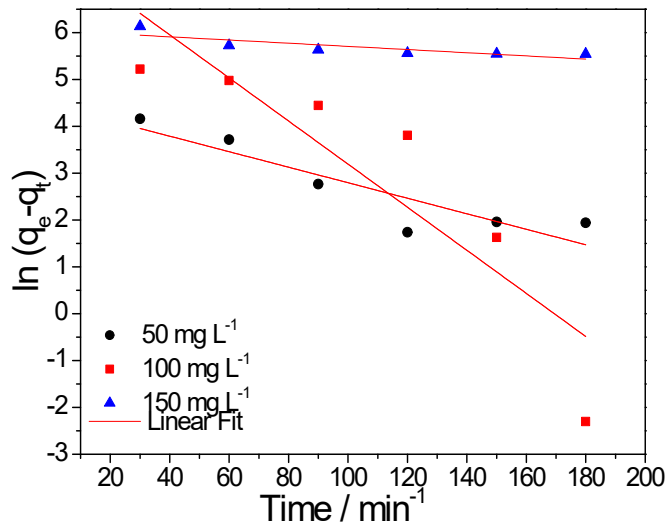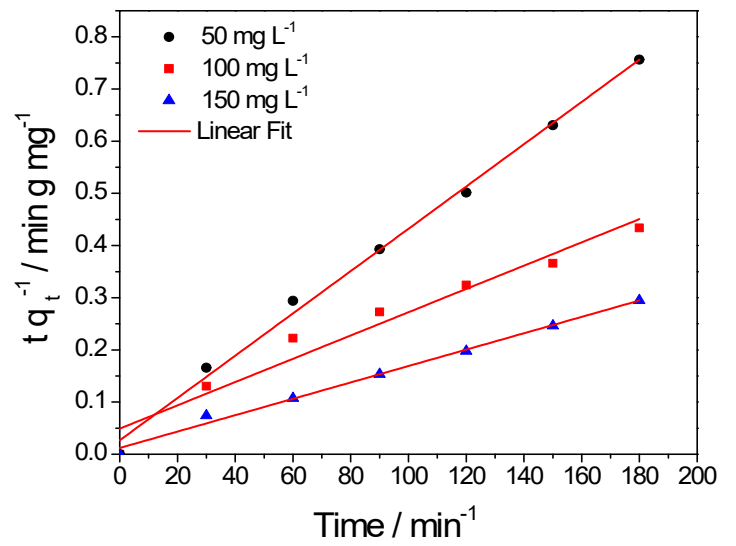

(a)

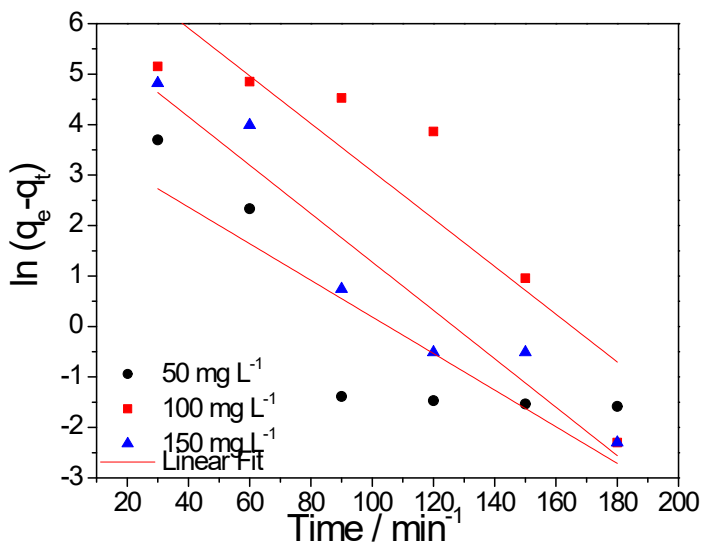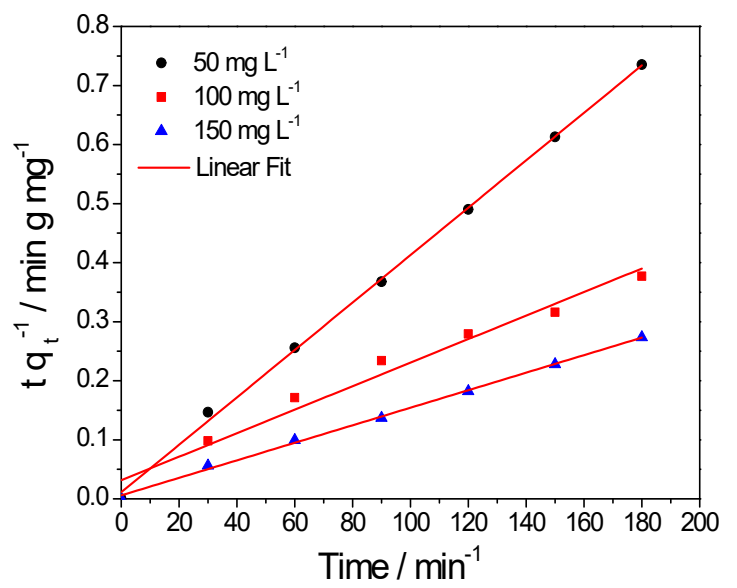

(b)

**Figure S3:** Pseudo-first-order & Pseudo-second-order kinetic model for (a) MB and (b) Pb<sup>2+</sup> adsorption process onto the prepared GO\_3@PVA coated film.

**Table S1:** The contact angle of the prepared films.

| <b>Film</b> | <b>Thickness /<br/>μm</b> | <b>Contact<br/>angle/ °</b> |
|-------------|---------------------------|-----------------------------|
| PVA         | 85                        | 85±1                        |
| GO_1@PVA    | 98                        | 65±1                        |
| GO_2@PVA    | 105                       | 61±1                        |
| GO_3@PVA    | 112                       | 60±1                        |

\*the measurements were replicated three times for the same prepared membranes and the standard deviation was evaluated accordingly for all tests.

**Table S2:** The Box-Behnken design matrix and results for the three variables that influenced on removal (%) of experimental and predicted values for MB dye and Pb<sup>+2</sup> ions using prepared GO\_3@PVA coated film.

| Trial | Time<br>(A; min) | initial<br>concentration<br>(B; mg L <sup>-1</sup> ) | Solution pH<br>(C) | Removal (%) |                  |           |                  |
|-------|------------------|------------------------------------------------------|--------------------|-------------|------------------|-----------|------------------|
|       |                  |                                                      |                    | Measured    |                  | Predicted |                  |
|       |                  |                                                      |                    | MB          | Pb <sup>+2</sup> | MB        | Pb <sup>+2</sup> |
| 1     | 60               | 100                                                  | 7                  | 53.6        | 87.9             | 52.8      | 87.6             |
| 2     | 120              | 150                                                  | 7                  | 68.7        | 95.3             | 68.7      | 95.3             |
| 3     | 120              | 150                                                  | 7                  | 68.7        | 95.3             | 68.7      | 95.3             |
| 4     | 60               | 200                                                  | 7                  | 61.2        | 91.5             | 63.1      | 92.1             |
| 5     | 120              | 200                                                  | 2                  | 20.1        | 41.1             | 23.9      | 45.6             |
| 6     | 120              | 150                                                  | 7                  | 68.7        | 95.3             | 68.7      | 95.3             |
| 7     | 120              | 100                                                  | 2                  | 18.8        | 35               | 25.3      | 40.4             |
| 8     | 120              | 200                                                  | 12                 | 98.1        | 9.8              | 91.6      | 4.4              |
| 9     | 120              | 150                                                  | 7                  | 68.7        | 95.3             | 68.7      | 95.3             |
| 10    | 120              | 150                                                  | 7                  | 68.7        | 95.3             | 68.7      | 95.3             |
| 11    | 180              | 150                                                  | 12                 | 97.8        | 10.2             | 103.5     | 15.3             |
| 12    | 60               | 150                                                  | 2                  | 16.5        | 49.3             | 10.8      | 44.2             |
| 13    | 180              | 150                                                  | 2                  | 28.4        | 63.2             | 23.8      | 58.4             |

Supplementary Material

|           |     |     |    |      |      |      |      |
|-----------|-----|-----|----|------|------|------|------|
| <b>14</b> | 180 | 100 | 7  | 91.5 | 99.8 | 89.6 | 99.2 |
| <b>15</b> | 180 | 200 | 7  | 76.3 | 98.6 | 77.1 | 98.9 |
| <b>16</b> | 60  | 150 | 12 | 61.3 | 6.2  | 65.9 | 11   |
| <b>17</b> | 120 | 100 | 12 | 96.3 | 10   | 92.5 | 5.5  |

**Table S3:** Regression Statistics of MB removal

|                  |       |                                |         |
|------------------|-------|--------------------------------|---------|
| <b>Std. Dev.</b> | 5.73  | <b>R<sup>2</sup></b>           | 0.9807  |
| <b>Mean</b>      | 62.55 | <b>Adjusted R<sup>2</sup></b>  | 0.9560  |
| <b>C.V. %</b>    | 9.17  | <b>Predicted R<sup>2</sup></b> | 0.6918  |
|                  |       | <b>Adeq Precision</b>          | 21.0951 |

- The Predicted R<sup>2</sup> of 0.6918 is not as close to the Adjusted R<sup>2</sup> of 0.9560 as one might normally expect; i.e. the difference is more than 0.2. This may indicate a large block effect.
- Adeq Precision measures the signal to noise ratio. A ratio greater than 4 is desirable. The obtained ratio of 21.095 indicates an adequate signal. This model can be used to navigate the design space.

**Table S4:** ANOVA for Quadratic model of MB removal

| Source                    | Sum of Squares | df | Mean Square | F-value | p-value              |
|---------------------------|----------------|----|-------------|---------|----------------------|
| <b>Model</b>              | 11717.91       | 9  | 1301.99     | 39.60   | < 0.0001 significant |
| A-time                    | 1285.25        | 1  | 1285.25     | 39.09   | 0.0004               |
| B-MBinitial concentration | 2.53           | 1  | 2.53        | 0.0770  | 0.7894               |
| C-solution pH             | 9092.26        | 1  | 9092.26     | 276.52  | < 0.0001             |
| AB                        | 129.96         | 1  | 129.96      | 3.95    | 0.0871               |
| AC                        | 151.29         | 1  | 151.29      | 4.60    | 0.0691               |
| BC                        | 0.0625         | 1  | 0.0625      | 0.0019  | 0.9664               |
| A <sup>2</sup>            | 30.41          | 1  | 30.41       | 0.9249  | 0.3682               |
| B <sup>2</sup>            | 90.55          | 1  | 90.55       | 2.75    | 0.1410               |
| C <sup>2</sup>            | 948.95         | 1  | 948.95      | 28.86   | 0.0010               |
| <b>Residual</b>           | 230.17         | 7  | 32.88       |         |                      |
| Lack of Fit               | 230.17         | 3  | 76.72       |         |                      |
| Pure Error                | 0.0000         | 4  | 0.0000      |         |                      |

|                  |          |    |
|------------------|----------|----|
| <b>Cor Total</b> | 11948.08 | 16 |
|------------------|----------|----|

**Sum of squares is Type III - Partial**

The Model F-value of 39.60 implies the model is significant. There is only a 0.01% chance that an F-value this large could occur due to noise. P-values less than 0.0500 indicate model terms are significant. In this case A, C, C<sup>2</sup> are significant model terms.

**Table S5:** Regression Statistics of Pb<sup>+2</sup> removal

|                  |       |                                |         |
|------------------|-------|--------------------------------|---------|
| <b>Std. Dev.</b> | 5.34  | <b>R<sup>2</sup></b>           | 0.9911  |
| <b>Mean</b>      | 63.48 | <b>Adjusted R<sup>2</sup></b>  | 0.9796  |
| <b>C.V. %</b>    | 8.41  | <b>Predicted R<sup>2</sup></b> | 0.8572  |
|                  |       | <b>Adeq Precision</b>          | 23.1514 |

- The Predicted R<sup>2</sup> of 0.8572 is in reasonable agreement with the Adjusted R<sup>2</sup> of 0.9796; i.e. the difference is less than 0.2.
- Adeq Precision measures the signal to noise ratio. A ratio greater than 4 is desirable. The obtained ratio of 23.151 indicates an adequate signal. This model can be used to navigate the design space.

**Table S6:** ANOVA for Quadratic model of Pb<sup>+2</sup> removal

| Source                  | Sum of Squares | df | Mean Square | F-value | p-value              |
|-------------------------|----------------|----|-------------|---------|----------------------|
| <b>Model</b>            | 22171.42       | 9  | 2463.49     | 86.36   | < 0.0001 significant |
| A-light intensity       | 170.20         | 1  | 170.20      | 5.97    | 0.0446               |
| B-initial concentration | 8.61           | 1  | 8.61        | 0.3019  | 0.5998               |
| C-film weight           | 2903.22        | 1  | 2903.22     | 101.77  | < 0.0001             |
| AB                      | 5.76           | 1  | 5.76        | 0.2019  | 0.6668               |
| AC                      | 24.50          | 1  | 24.50       | 0.8589  | 0.3849               |
| BC                      | 9.92           | 1  | 9.92        | 0.3478  | 0.5739               |
| A <sup>2</sup>          | 57.64          | 1  | 57.64       | 2.02    | 0.1982               |
| B <sup>2</sup>          | 87.17          | 1  | 87.17       | 3.06    | 0.1239               |
| C <sup>2</sup>          | 18774.32       | 1  | 18774.32    | 658.13  | < 0.0001             |
| <b>Residual</b>         | 199.69         | 7  | 28.53       |         |                      |
| Lack of Fit             | 199.69         | 3  | 66.56       |         |                      |
| Pure Error              | 0.0000         | 4  | 0.0000      |         |                      |
| <b>Cor Total</b>        | 22371.11       | 16 |             |         |                      |

**Sum of squares is Type III - Partial**



*Supplementary Material*

The Model F-value of 86.36 implies the model is significant. There is only a 0.01% chance that an F-value this large could occur due to noise. P-values less than 0.0500 indicate model terms are significant. In this case A, C, C<sup>2</sup> are significant model terms.
